# Supplementary material for: Theoretical insights into the structural, photophysical and nonlinear optical properties of phenoxazin-3-one dyes
Source: Royal Society of Chemistry journal article supplement (doi:10.1039/c9nj02690h), 2019-01-01
Supplement: c9nj02690h1.pdf [file c9nj02690h1.pdf]

**Table S1:** The complete NBO characteristics of Resazurin molecule

| Bond orbital | Occupancy | Atom | Contribution from Parent NBO (%) | Coefficients | Atomic Hybrid Contribution (%)                                 |
|--------------|-----------|------|----------------------------------|--------------|----------------------------------------------------------------|
| H1 – C2      | 1.97568   | H1   | 35.98                            | 0.5998       | s( 99.96)+p <sup>0.00</sup> ( 0.04)                            |
|              |           | C2   | 64.02                            | 0.8002       | s( 30.41)+p <sup>2.29</sup> ( 69.57)+d <sup>0.00</sup> ( 0.02) |
| C2 – C4      | 1.97012   | C2   | 48.37                            | 0.6955       | s( 32.96)+p <sup>2.03</sup> ( 67.01)+d <sup>0.00</sup> ( 0.03) |
|              |           | C4   | 51.63                            | 0.7186       | s( 37.67)+p <sup>1.65</sup> ( 62.31)+d <sup>0.00</sup> ( 0.02) |
| C2 – C5      | 1.97656   | C2   | 50.59                            | 0.7112       | s( 36.62)+p <sup>1.73</sup> ( 63.35)+d <sup>0.00</sup> ( 0.03) |
|              |           | C5   | 49.41                            | 0.7030       | s( 36.33)+p <sup>1.75</sup> ( 63.64)+d <sup>0.00</sup> ( 0.03) |
| C2=C5        | 1.76532   | C2   | 47.30                            | 0.6878       | s( 0.00)+p <sup>1.00</sup> ( 99.96)+d <sup>0.00</sup> ( 0.04)  |
|              |           | C5   | 52.70                            | 0.7259       | s( 0.00)+p <sup>1.00</sup> ( 99.96)+d <sup>0.00</sup> ( 0.04)  |
| C3 – C6      | 1.97444   | C3   | 50.88                            | 0.7133       | s( 35.00)+p <sup>1.86</sup> ( 64.98)+d <sup>0.00</sup> ( 0.03) |
|              |           | C6   | 49.12                            | 0.7008       | s( 35.92)+p <sup>1.78</sup> ( 64.05)+d <sup>0.00</sup> ( 0.03) |
| C3=C6        | 1.58796   | C3   | 58.92                            | 0.7676       | s( 0.00)+p <sup>1.00</sup> ( 99.97)+d <sup>0.00</sup> ( 0.03)  |
|              |           | C6   | 41.08                            | 0.6409       | s( 0.00)+p <sup>1.00</sup> ( 99.96)+d <sup>0.00</sup> ( 0.04)  |
| C3 - C7      | 1.97271   | C3   | 48.78                            | 0.6984       | s( 34.87)+p <sup>1.87</sup> ( 65.10)+d <sup>0.00</sup> ( 0.03) |
|              |           | C7   | 51.22                            | 0.7157       | s( 39.15)+p <sup>1.55</sup> ( 60.83)+d <sup>0.00</sup> ( 0.02) |
| C3 - H9      | 1.97490   | C3   | 62.74                            | 0.7921       | s( 30.11)+p <sup>2.32</sup> ( 69.86)+d <sup>0.00</sup> ( 0.02) |
|              |           | H9   | 37.26                            | 0.6104       | s( 99.96)+p <sup>0.00</sup> ( 0.04)                            |
| C4 - C7      | 1.97394   | C4   | 50.54                            | 0.7109       | s( 35.14)+p <sup>1.85</sup> ( 64.83)+d <sup>0.00</sup> ( 0.03) |
|              |           | C7   | 49.46                            | 0.7033       | s( 36.60)+p <sup>1.73</sup> ( 63.37)+d <sup>0.00</sup> ( 0.03) |
| C4= C7       | 1.60434   | C4   | 56.06                            | 0.7488       | s( 0.00)+p <sup>1.00</sup> ( 99.98)+d <sup>0.00</sup> ( 0.02)  |
|              |           | C7   | 43.94                            | 0.6628       | s( 0.00)+p <sup>1.00</sup> ( 99.97)+d <sup>0.00</sup> ( 0.03)  |
| C4- N10      | 1.98411   | C4   | 37.74                            | 0.6143       | s( 27.08)+p <sup>2.69</sup> ( 72.83)+d <sup>0.00</sup> ( 0.09) |
|              |           | N10  | 62.26                            | 0.7890       | s( 34.60)+p <sup>1.89</sup> ( 65.38)+d <sup>0.00</sup> ( 0.02) |
| C5 - C6      | 1.97933   | C5   | 50.42                            | 0.7101       | s( 33.87)+p <sup>1.95</sup> ( 66.10)+d <sup>0.00</sup> ( 0.03) |
|              |           | C6   | 49.58                            | 0.7041       | s( 35.71)+p <sup>1.80</sup> ( 64.26)+d <sup>0.00</sup> ( 0.03) |
| C5 -H8       | 1.97936   | C5   | 62.35                            | 0.7896       | s( 29.77)+p <sup>2.36</sup> ( 70.21)+d <sup>0.00</sup> ( 0.03) |
|              |           | H8   | 37.65                            | 0.6136       | s( 99.96)+p <sup>0.00</sup> ( 0.04)                            |
| C6 - O22     | 1.99283   | C6   | 34.20                            | 0.5848       | s( 28.06)+p <sup>2.56</sup> ( 71.78)+d <sup>0.01</sup> ( 0.16) |
|              |           | O22  | 65.80                            | 0.8112       | s( 40.24)+p <sup>1.48</sup> ( 59.71)+d <sup>0.00</sup> ( 0.05) |
| C7 - O13     | 1.98910   | C7   | 32.24                            | 0.5678       | s( 24.04)+p <sup>3.15</sup> ( 75.77)+d <sup>0.01</sup> ( 0.19) |
|              |           | O13  | 67.76                            | 0.8232       | s( 31.98)+p <sup>2.12</sup> ( 67.96)+d <sup>0.00</sup> ( 0.06) |
| N10- C11     | 1.98588   | N10  | 62.39                            | 0.7899       | s( 37.17)+p <sup>1.69</sup> ( 62.80)+d <sup>0.00</sup> ( 0.02) |
|              |           | C11  | 37.61                            | 0.6132       | s( 28.17)+p <sup>2.55</sup> ( 71.74)+d <sup>0.00</sup> ( 0.09) |
| N10= C11     | 1.76261   | N10  | 60.65                            | 0.7788       | s( 0.00)+p <sup>1.00</sup> ( 99.97)+d <sup>0.00</sup> ( 0.03)  |
|              |           | C11  | 39.35                            | 0.6273       | s( 0.00)+p <sup>1.00</sup> ( 99.92)+d <sup>0.00</sup> ( 0.08)  |
| N10- O24     | 1.99273   | N10  | 50.24                            | 0.7088       | s( 27.99)+p <sup>2.57</sup> ( 71.93)+d <sup>0.00</sup> ( 0.08) |
|              |           | O24  | 49.76                            | 0.7054       | s( 22.18)+p <sup>3.50</sup> ( 77.69)+d <sup>0.01</sup> ( 0.13) |
| C11 - C12    | 1.97283   | C11  | 50.69                            | 0.7120       | s( 34.69)+p <sup>1.88</sup> ( 65.28)+d <sup>0.00</sup> ( 0.03) |
|              |           | C12  | 49.31                            | 0.7022       | s( 35.51)+p <sup>1.82</sup> ( 64.46)+d <sup>0.00</sup> ( 0.03) |
| C11 – C14    | 1.96887   | C11  | 51.85                            | 0.7201       | s( 37.03)+p <sup>1.70</sup> ( 62.96)+d <sup>0.00</sup> ( 0.02) |
|              |           | C14  | 48.15                            | 0.6939       | s( 32.02)+p <sup>2.12</sup> ( 67.95)+d <sup>0.00</sup> ( 0.04) |
| C12 – O13    | 1.98867   | C12  | 31.86                            | 0.5645       | s( 23.62)+p <sup>3.23</sup> ( 76.19)+d <sup>0.01</sup> ( 0.20) |

|           |         |            |       |        |                                           |
|-----------|---------|------------|-------|--------|-------------------------------------------|
|           |         | <i>O13</i> | 68.14 | 0.8255 | $s(31.68)+p^{2.15}(68.26)+d^{0.00}(0.06)$ |
| C12 – C19 | 1.97601 | <i>C12</i> | 51.61 | 0.7184 | $s(40.67)+p^{1.46}(59.31)+d^{0.00}(0.02)$ |
|           |         | <i>C19</i> | 48.39 | 0.6956 | $s(35.45)+p^{1.82}(64.51)+d^{0.00}(0.04)$ |
| C12 = C19 | 1.80551 | <i>C12</i> | 48.02 | 0.6930 | $s(0.00)+p^{1.00}(99.96)+d^{0.00}(0.04)$  |
|           |         | <i>C19</i> | 51.98 | 0.7210 | $s(0.00)+p^{1.00}(99.95)+d^{0.00}(0.05)$  |
| C14 – H15 | 1.97608 | <i>C14</i> | 63.98 | 0.7999 | $s(30.62)+p^{2.27}(69.36)+d^{0.00}(0.02)$ |
|           |         | <i>H15</i> | 36.02 | 0.6002 | $s(99.96)+p^{0.00}(0.04)$                 |
| C14 – C16 | 1.98034 | <i>C14</i> | 50.97 | 0.7139 | $s(37.36)+p^{1.68}(62.62)+d^{0.00}(0.03)$ |
|           |         | <i>C16</i> | 49.03 | 0.7002 | $s(36.86)+p^{1.71}(63.11)+d^{0.00}(0.03)$ |
| C14 = C16 | 1.80419 | <i>C14</i> | 50.46 | 0.7104 | $s(0.00)+p^{1.00}(99.96)+d^{0.00}(0.04)$  |
|           |         | <i>C16</i> | 49.54 | 0.7038 | $s(0.00)+p^{1.00}(99.95)+d^{0.00}(0.05)$  |
| C16 – H17 | 1.97919 | <i>C16</i> | 62.86 | 0.7929 | $s(30.11)+p^{2.32}(69.86)+d^{0.00}(0.03)$ |
|           |         | <i>H17</i> | 37.14 | 0.6094 | $s(99.96)+p^{0.00}(0.04)$                 |
| C16 – C18 | 1.98240 | <i>C16</i> | 51.34 | 0.7165 | $s(33.01)+p^{2.03}(66.96)+d^{0.00}(0.03)$ |
|           |         | <i>C18</i> | 48.66 | 0.6976 | $s(34.25)+p^{1.92}(65.72)+d^{0.00}(0.04)$ |
| C18 – C19 | 1.97457 | <i>C18</i> | 48.31 | 0.6950 | $s(34.76)+p^{1.88}(65.20)+d^{0.00}(0.03)$ |
|           |         | <i>C19</i> | 51.69 | 0.7190 | $s(33.98)+p^{1.94}(65.99)+d^{0.00}(0.03)$ |
| C18 – O21 | 1.99534 | <i>C18</i> | 35.74 | 0.5979 | $s(30.72)+p^{2.25}(69.20)+d^{0.00}(0.08)$ |
|           |         | <i>O21</i> | 64.26 | 0.8016 | $s(38.65)+p^{1.58}(61.08)+d^{0.01}(0.27)$ |
| C18 = O21 | 1.93418 | <i>C18</i> | 33.51 | 0.5789 | $s(0.00)+p^{1.00}(99.88)+d^{0.00}(0.12)$  |
|           |         | <i>O21</i> | 66.49 | 0.8154 | $s(0.00)+p^{1.00}(99.75)+d^{0.00}(0.25)$  |
| C19 – H20 | 1.97359 | <i>C19</i> | 63.18 | 0.7949 | $s(30.56)+p^{2.27}(69.42)+d^{0.00}(0.02)$ |
|           |         | <i>H20</i> | 36.82 | 0.6068 | $s(99.96)+p^{0.00}(0.04)$                 |

**Table S2:** Same as Table S1, for resorufin molecule

| Bond Orbital | Occupancy | Atom | Contribution from Parent NBO (%) | Coefficients | Atomic Hybrid Contribution (%)            |
|--------------|-----------|------|----------------------------------|--------------|-------------------------------------------|
| H1-C2        | 1.97872   | H1   | 36.75                            | 0.6062       | $s(99.96)+p^{0.00}(0.04)$                 |
|              |           | C2   | 63.25                            | 0.7953       | $s(30.35)+p^{2.29}(69.62)+d^{0.00}(0.03)$ |
| C2-C4        | 1.97185   | C2   | 48.63                            | 0.6973       | $s(33.17)+p^{2.01}(66.80)+d^{0.00}(0.03)$ |
|              |           | C4   | 51.37                            | 0.7168       | $s(35.86)+p^{1.79}(64.12)+d^{0.00}(0.02)$ |
| C2-C5        | 1.97878   | C2   | 50.31                            | 0.7093       | $s(36.47)+p^{1.74}(63.51)+d^{0.00}(0.03)$ |
|              |           | C5   | 49.69                            | 0.7049       | $s(36.34)+p^{1.75}(63.63)+d^{0.00}(0.03)$ |
| C2=C5        | 1.77603   | C2   | 47.08                            | 0.6861       | $s(0.00)+p^{1.00}(99.96)+d^{0.00}(0.04)$  |
|              |           | C5   | 52.92                            | 0.7275       | $s(0.00)+p^{1.00}(99.97)+d^{0.00}(0.03)$  |
| C3-C6        | 1.97220   | C3   | 50.88                            | 0.7133       | $s(34.34)+p^{1.91}(65.65)+d^{0.00}(0.01)$ |
|              |           | C6   | 49.12                            | 0.7009       | $s(35.56)+p^{1.81}(64.37)+d^{0.00}(0.07)$ |
| C3=C6        | 1.57554   | C3   | 59.50                            | 0.7713       | $s(0.00)+p^{1.00}(99.97)+d^{0.00}(0.03)$  |
|              |           | C6   | 40.50                            | 0.6364       | $s(0.00)+p^{1.00}(99.96)+d^{0.00}(0.04)$  |
| C3-C7        | 1.97450   | C3   | 48.87                            | 0.6991       | $s(34.50)+p^{1.90}(65.46)+d^{0.00}(0.03)$ |
|              |           | C7   | 51.13                            | 0.7151       | $s(39.68)+p^{1.52}(60.30)+d^{0.00}(0.02)$ |
| C3-H9        | 1.97733   | C3   | 62.78                            | 0.7923       | $s(31.16)+p^{2.21}(68.82)+d^{0.00}(0.02)$ |
|              |           | H9   | 37.22                            | 0.6101       | $s(99.96)+p^{0.00}(0.04)$                 |

|         |         |     |       |        |                                           |
|---------|---------|-----|-------|--------|-------------------------------------------|
| C4-C7   | 1.97679 | C4  | 49.74 | 0.7053 | $s(33.28)+p^{2.00}(66.69)+d^{0.00}(0.03)$ |
|         |         | C7  | 50.26 | 0.7089 | $s(36.47)+p^{1.74}(63.50)+d^{0.00}(0.03)$ |
| C4=C7   | 1.52421 | C4  | 53.71 | 0.7329 | $s(0.00)+p^{1.00}(99.99)+d^{0.00}(0.01)$  |
|         |         | C7  | 46.29 | 0.6804 | $s(0.00)+p^{1.00}(99.98)+d^{0.00}(0.02)$  |
| C4-N10  | 1.98120 | C4  | 42.11 | 0.6489 | $s(30.70)+p^{2.26}(69.23)+d^{0.00}(0.07)$ |
|         |         | N10 | 57.89 | 0.7608 | $s(33.30)+p^{2.00}(66.64)+d^{0.00}(0.06)$ |
| C5-C6   | 1.97704 | C5  | 50.33 | 0.7094 | $s(33.12)+p^{2.02}(66.87)+d^{0.00}(0.01)$ |
|         |         | C6  | 49.67 | 0.7048 | $s(35.42)+p^{1.82}(64.52)+d^{0.00}(0.06)$ |
| C5-H8   | 1.98101 | C5  | 62.49 | 0.7905 | $s(30.53)+p^{2.27}(69.44)+d^{0.00}(0.03)$ |
|         |         | H8  | 37.51 | 0.6124 | $s(99.96)+p^{0.00}(0.04)$                 |
| C6-O22  | 1.99367 | C6  | 35.04 | 0.5919 | $s(28.50)+p^{2.50}(71.32)+d^{0.01}(0.18)$ |
|         |         | O22 | 64.96 | 0.8060 | $s(39.41)+p^{1.54}(60.52)+d^{0.00}(0.07)$ |
| C7-O13  | 1.98909 | C7  | 31.93 | 0.5651 | $s(23.70)+p^{3.21}(76.12)+d^{0.01}(0.19)$ |
|         |         | O13 | 68.07 | 0.8250 | $s(32.16)+p^{2.11}(67.78)+d^{0.00}(0.06)$ |
| N10-C11 | 1.98400 | N10 | 58.10 | 0.7622 | $s(35.85)+p^{1.79}(64.10)+d^{0.00}(0.06)$ |
|         |         | C11 | 41.90 | 0.6473 | $s(31.85)+p^{2.14}(68.08)+d^{0.00}(0.07)$ |
| N10=C11 | 1.75298 | N10 | 54.80 | 0.7403 | $s(0.00)+p^{1.00}(99.82)+d^{0.00}(0.18)$  |
|         |         | C11 | 45.20 | 0.6723 | $s(0.00)+p^{1.00}(99.92)+d^{0.00}(0.08)$  |
| C11-C12 | 1.97606 | C11 | 50.08 | 0.7076 | $s(32.94)+p^{2.04}(67.04)+d^{0.00}(0.02)$ |
|         |         | C12 | 49.92 | 0.7066 | $s(35.42)+p^{1.82}(64.53)+d^{0.00}(0.06)$ |
| C11-C14 | 1.97147 | C11 | 51.52 | 0.7178 | $s(35.08)+p^{1.85}(64.89)+d^{0.00}(0.02)$ |
|         |         | C14 | 48.48 | 0.6963 | $s(32.08)+p^{2.12}(67.88)+d^{0.00}(0.03)$ |
| C12-O13 | 1.98764 | C12 | 31.64 | 0.5625 | $s(23.07)+p^{3.33}(76.70)+d^{0.01}(0.24)$ |
|         |         | O13 | 68.36 | 0.8268 | $s(32.02)+p^{2.12}(67.93)+d^{0.00}(0.05)$ |
| C12-C19 | 1.97231 | C12 | 51.53 | 0.7179 | $s(41.05)+p^{1.43}(58.91)+d^{0.00}(0.04)$ |
|         |         | C19 | 48.47 | 0.6962 | $s(35.28)+p^{1.83}(64.67)+d^{0.00}(0.06)$ |
| C12=C19 | 1.80671 | C12 | 47.62 | 0.6900 | $s(0.00)+p^{1.00}(99.96)+d^{0.00}(0.04)$  |
|         |         | C19 | 52.38 | 0.7238 | $s(0.00)+p^{1.00}(99.95)+d^{0.00}(0.05)$  |
| C14-H15 | 1.97855 | C14 | 63.33 | 0.7958 | $s(30.65)+p^{2.26}(69.32)+d^{0.00}(0.03)$ |
|         |         | H15 | 36.67 | 0.6055 | $s(99.96)+p^{0.00}(0.04)$                 |
| C14-C16 | 1.98253 | C14 | 50.67 | 0.7118 | $s(37.25)+p^{1.68}(62.72)+d^{0.00}(0.03)$ |
|         |         | C16 | 49.33 | 0.7024 | $s(37.07)+p^{1.70}(62.90)+d^{0.00}(0.03)$ |
| C14=C16 | 1.81504 | C14 | 49.98 | 0.7070 | $s(0.00)+p^{1.00}(99.96)+d^{0.00}(0.04)$  |
|         |         | C16 | 50.02 | 0.7072 | $s(0.00)+p^{1.00}(99.96)+d^{0.00}(0.04)$  |
| C16-H17 | 1.98035 | C16 | 63.11 | 0.7944 | $s(30.93)+p^{2.23}(69.05)+d^{0.00}(0.03)$ |
|         |         | H17 | 36.89 | 0.6073 | $s(99.96)+p^{0.00}(0.04)$                 |
| C16-C18 | 1.98023 | C16 | 50.85 | 0.7131 | $s(31.99)+p^{2.12}(67.97)+d^{0.00}(0.03)$ |
|         |         | C18 | 49.15 | 0.7011 | $s(34.03)+p^{1.94}(65.94)+d^{0.00}(0.04)$ |
| C18-C19 | 1.97344 | C18 | 48.89 | 0.6992 | $s(34.60)+p^{1.89}(65.37)+d^{0.00}(0.02)$ |
|         |         | C19 | 51.11 | 0.7149 | $s(33.11)+p^{2.02}(66.83)+d^{0.00}(0.06)$ |
| C18-O21 | 1.99576 | C18 | 36.12 | 0.6010 | $s(31.23)+p^{2.20}(68.71)+d^{0.00}(0.06)$ |
|         |         | O21 | 63.88 | 0.7993 | $s(38.04)+p^{1.62}(61.64)+d^{0.01}(0.32)$ |
| C18=O21 | 1.93761 | C18 | 32.64 | 0.5713 | $s(0.00)+p^{1.00}(99.89)+d^{0.00}(0.11)$  |
|         |         | O21 | 67.36 | 0.8207 | $s(0.00)+p^{1.00}(99.75)+d^{0.00}(0.25)$  |
| C19-H20 | 1.97548 | C19 | 63.37 | 0.7960 | $s(31.50)+p^{2.17}(68.46)+d^{0.00}(0.04)$ |
|         |         | H20 | 36.63 | 0.6052 | $s(99.97)+p^{0.00}(0.03)$                 |

**Table S3:** Absorption and Emission properties of dihydroresorufin

| TDDFT Absorption   |               |                          |                                                       | TDDFT Emission     |               |                  |                                                     |                                          |
|--------------------|---------------|--------------------------|-------------------------------------------------------|--------------------|---------------|------------------|-----------------------------------------------------|------------------------------------------|
| $E_\alpha$<br>(eV) | $f_\alpha$    | $\lambda_{\max}$<br>(nm) | Transition ( $\alpha$ - State)                        | $E_\alpha$<br>(eV) | $f_\alpha$    | $\lambda_{\max}$ | Transition ( $\alpha$ - State)                      | Stoke's<br>shift<br>( $\text{cm}^{-1}$ ) |
| 2.69               | 0.0009        | 461.11                   | H(A) $\rightarrow$ L+1(A) (99%)(1)                    | 1.57               | 0.0013        | 785.30           | H(A) $\rightarrow$ L(A) (99%)(1)                    |                                          |
| 2.72               | 0.0173        | 455.82                   | H(A) $\rightarrow$ L(A) (96%) (2)                     | 2.32               | 0.0007        | 534.44           | H(A) $\rightarrow$ L+1(A) (100%)(2)                 |                                          |
| 3.12               | 0.0271        | 396.82                   | H (A) $\rightarrow$ L +2(A) (93%) (3)                 | 2.69               | 0.1527        | 460.72           | H(A) $\rightarrow$ L+2(A) (96%)(3)                  |                                          |
| <b>3.44</b>        | <b>0.2501</b> | <b>360.54</b>            | <b>H(A) <math>\rightarrow</math> L+3(A) (88%) (4)</b> | 3.14               | 0.0808        | 394.31           | H(A) $\rightarrow$ L+4(A) (46%)(4)                  |                                          |
| 3.51               | 0.0039        | 353.52                   | H(A) $\rightarrow$ L+4(A) (99%)(5)                    | 3.18               | 0.1176        | 389.40           | H(A) $\rightarrow$ L+4(A) (52%)(5)                  |                                          |
| 3.63               | 0.0007        | 341.29                   | H (A) $\rightarrow$ L+5 (A) (99%) (6)                 | 3.25               | 0.0507        | 381.98           | H-2(A) $\rightarrow$ L(A) (53%)(6)                  |                                          |
| 3.65               | 0.0096        | 339.63                   | H (A) $\rightarrow$ L+6(A) (97%) (7)                  | 3.26               | 0.0013        | 380.09           | H(A) $\rightarrow$ L+5(A) (98%)(7)                  |                                          |
| 3.78               | 0.0002        | 327.58                   | H (A) $\rightarrow$ L+7 (A) (100%) (8)                | <b>3.31</b>        | <b>0.2135</b> | <b>374.95</b>    | <b>H-2(A) <math>\rightarrow</math> LA) (42%)(8)</b> | <b>1065.9</b>                            |
| 3.88               | 0.0001        | 319.17                   | H(A) $\rightarrow$ L+8 (A) (100%) (9)                 | 3.33               | 0.0257        | 372.67           | H(A) $\rightarrow$ L+6(A) (70%)(9)                  |                                          |
| 3.90               | 0.0014        | 318.13                   | H-1(A) $\rightarrow$ L+1(A) (100%)(10)                | 3.42               | 0.0007        | 362.03           | H(A) $\rightarrow$ L+7(A) (100%)(10)                |                                          |
| 4.01               | 0.0964        | 309.26                   | H-1(A) $\rightarrow$ L (A)(78%) (11)                  | 3.51               | 0.0002        | 352.87           | H(A) $\rightarrow$ L+8(A) (100%)(11)                |                                          |
| 4.03               | 0.0008        | 307.54                   | H(A) $\rightarrow$ L+9(A)(99%) (12)(12)               | 3.66               | 0.001         | 339.16           | H(A) $\rightarrow$ L+9(A) (100%)(12)                |                                          |

**Table S4:** Comparison of different functionals to obtain the photophysical (in aniline solvent) and NLO properties (in gas phase) of both Rz and Rf dyes. The experimental values obtained from Ref. [14] are also included for the most dominant transitions, and the results from present study are highlighted in bold format for clarity.

| Dye | Method       | Photophysical properties |              |                                | Energy Gap (eV) | NLO properties |                                   |                                        |
|-----|--------------|--------------------------|--------------|--------------------------------|-----------------|----------------|-----------------------------------|----------------------------------------|
|     |              | Absorption /nm           | Emission /nm | Stokes shift /cm <sup>-1</sup> |                 | $\mu$ (Debye)  | $\alpha$ ( $\times 10^{-24}$ esu) | $\beta_{tot}$ ( $\times 10^{-30}$ esu) |
| Rz  | B3LYP        | 516.5                    | 590.3        | 2423                           | 2.526           | 20.816         | 24.017                            | 33.797                                 |
|     | PBE1PBE      | 497.0                    | 564.0        | 2108                           | 3.049           | 20.877         | 23.345                            | 34.267                                 |
|     | PBEPBE       | 558.2                    | 657.4        | 2704                           | 1.571           | 21.117         | 25.369                            | 23.955                                 |
|     | <b>BPW91</b> | <b>558.3</b>             | <b>658.2</b> | <b>2718</b>                    | <b>1.586</b>    | <b>21.240</b>  | <b>25.123</b>                     | <b>25.687</b>                          |
|     | Expt.        | 602                      | 634          | 838                            | -               | -              | -                                 | -                                      |
| Rf  | B3LYP        | 493.2                    | 558.4        | 2363                           | 2.382           | 19.884         | 23.998                            | 23.029                                 |
|     | PBE1PBE      | 481.9                    | 542.9        | 2330                           | 2.906           | 19.922         | 23.372                            | 25.665                                 |
|     | PBEPBE       | 524.1                    | 612.3        | 2746                           | 1.542           | 20.424         | 25.469                            | 10.654                                 |
|     | <b>BPW91</b> | <b>524.2</b>             | <b>612.6</b> | <b>2753</b>                    | <b>1.642</b>    | <b>20.602</b>  | <b>25.117</b>                     | <b>12.477</b>                          |
|     | Expt.        | 572                      | 585          | 389                            | -               | -              | -                                 | -                                      |

**Figure S1:** The density distribution diagram of transition orbitals (both absorption and emission in aniline solvent) for resazurin molecule

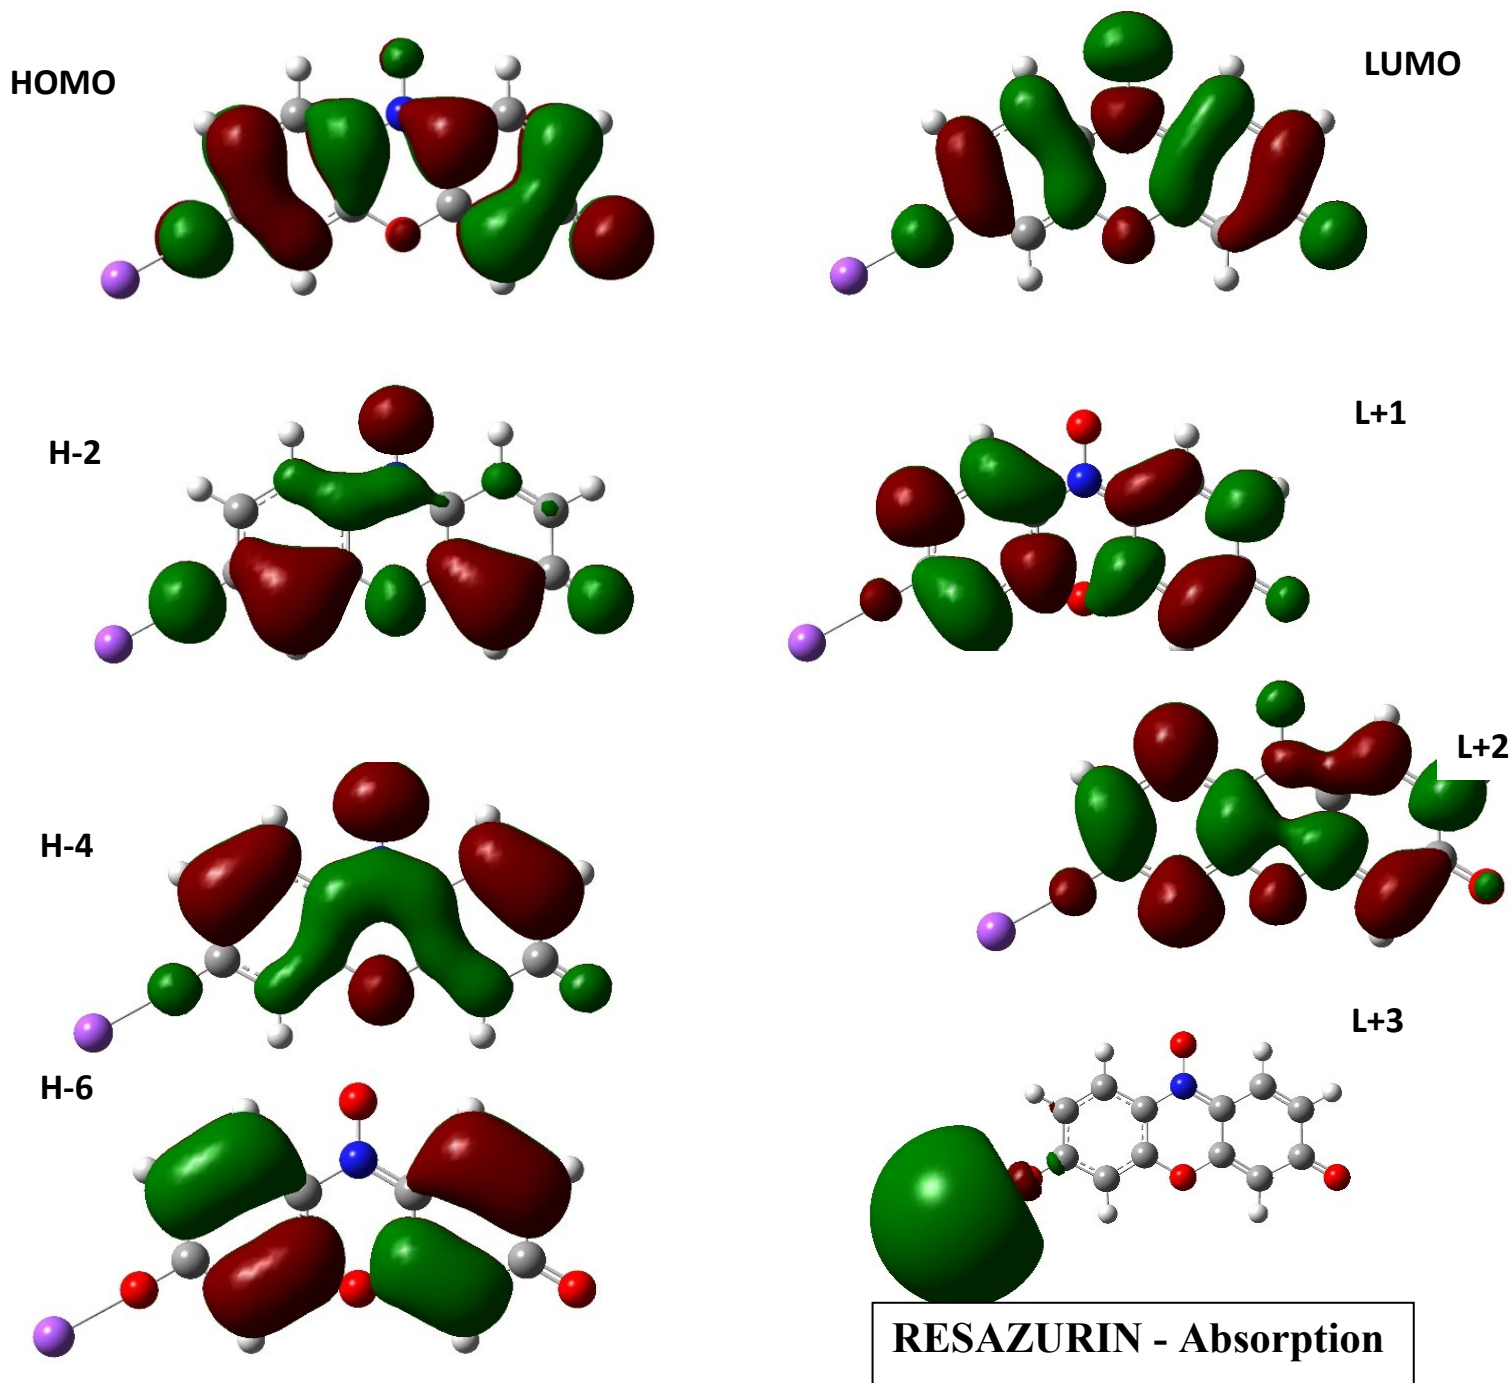

HOMO

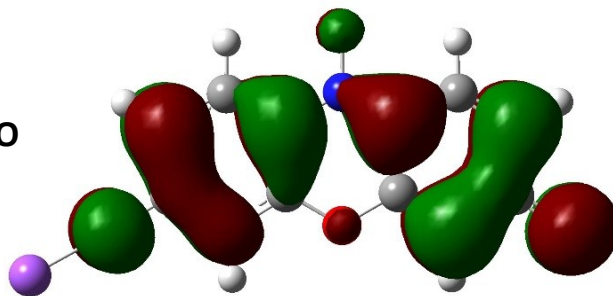

H-2

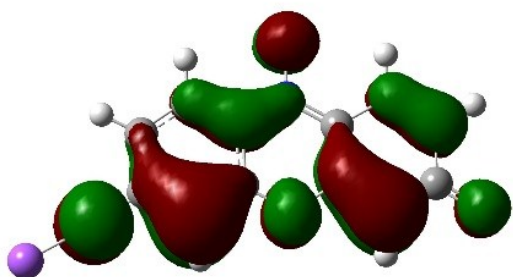

LUMO

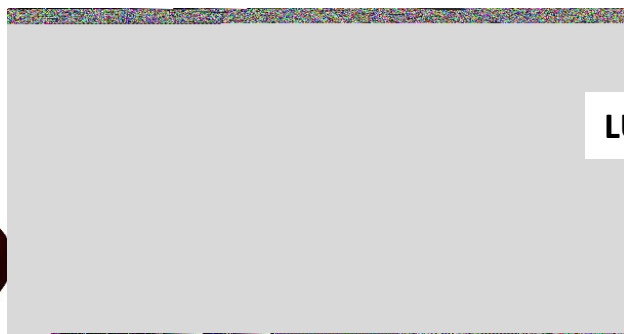

L+1

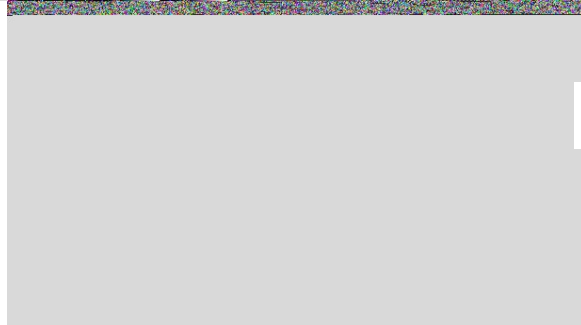

H-4

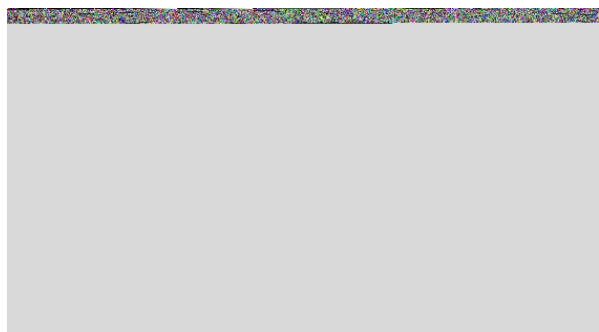

L+2

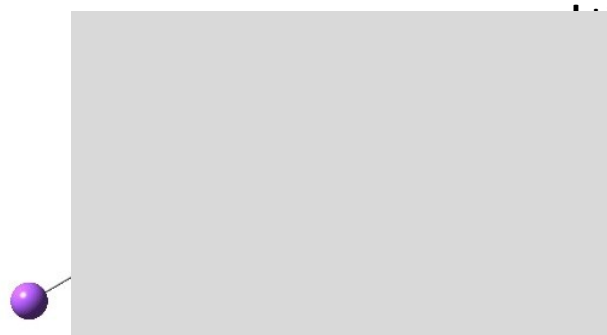

L+3

H-6

## RESAZURIN - Emission

Figure S2: Same as Fig. S1, for resorufin molecule

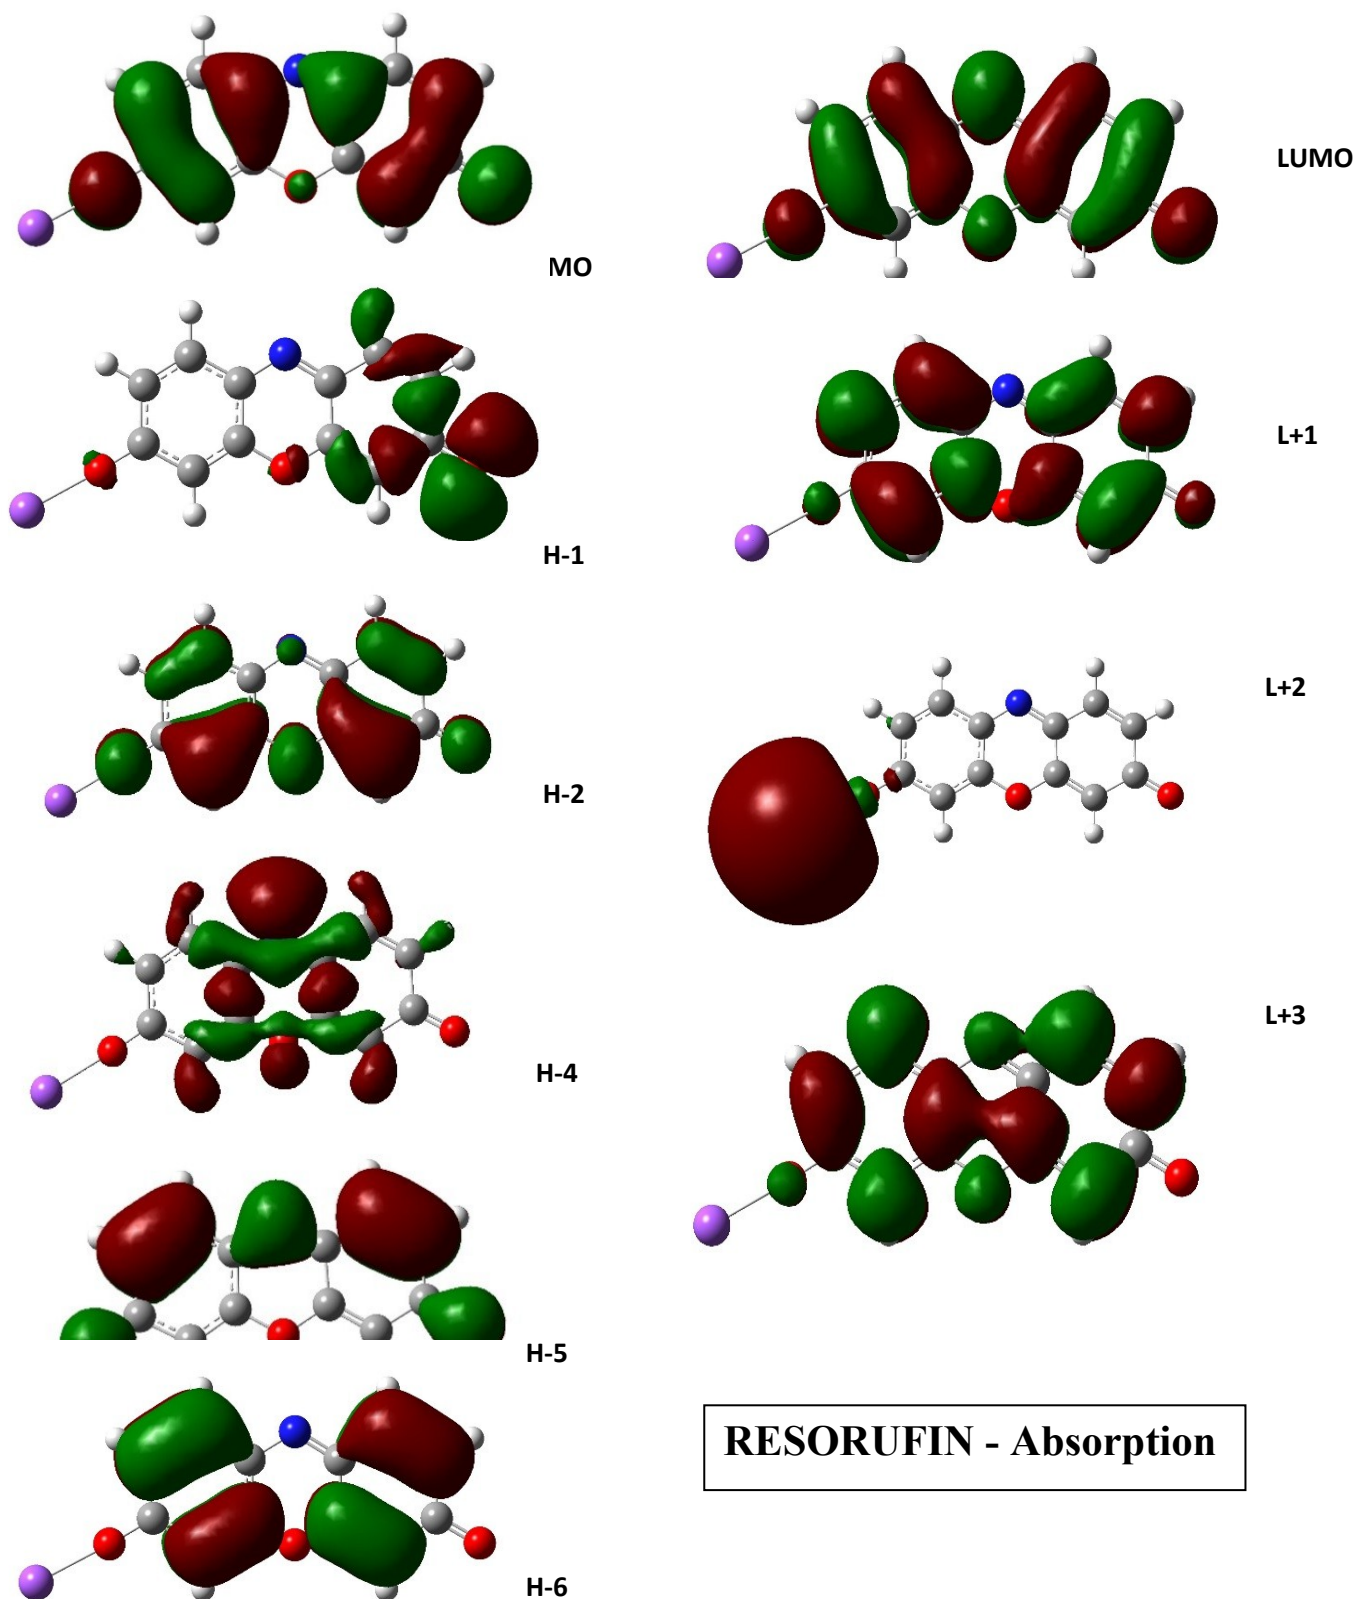



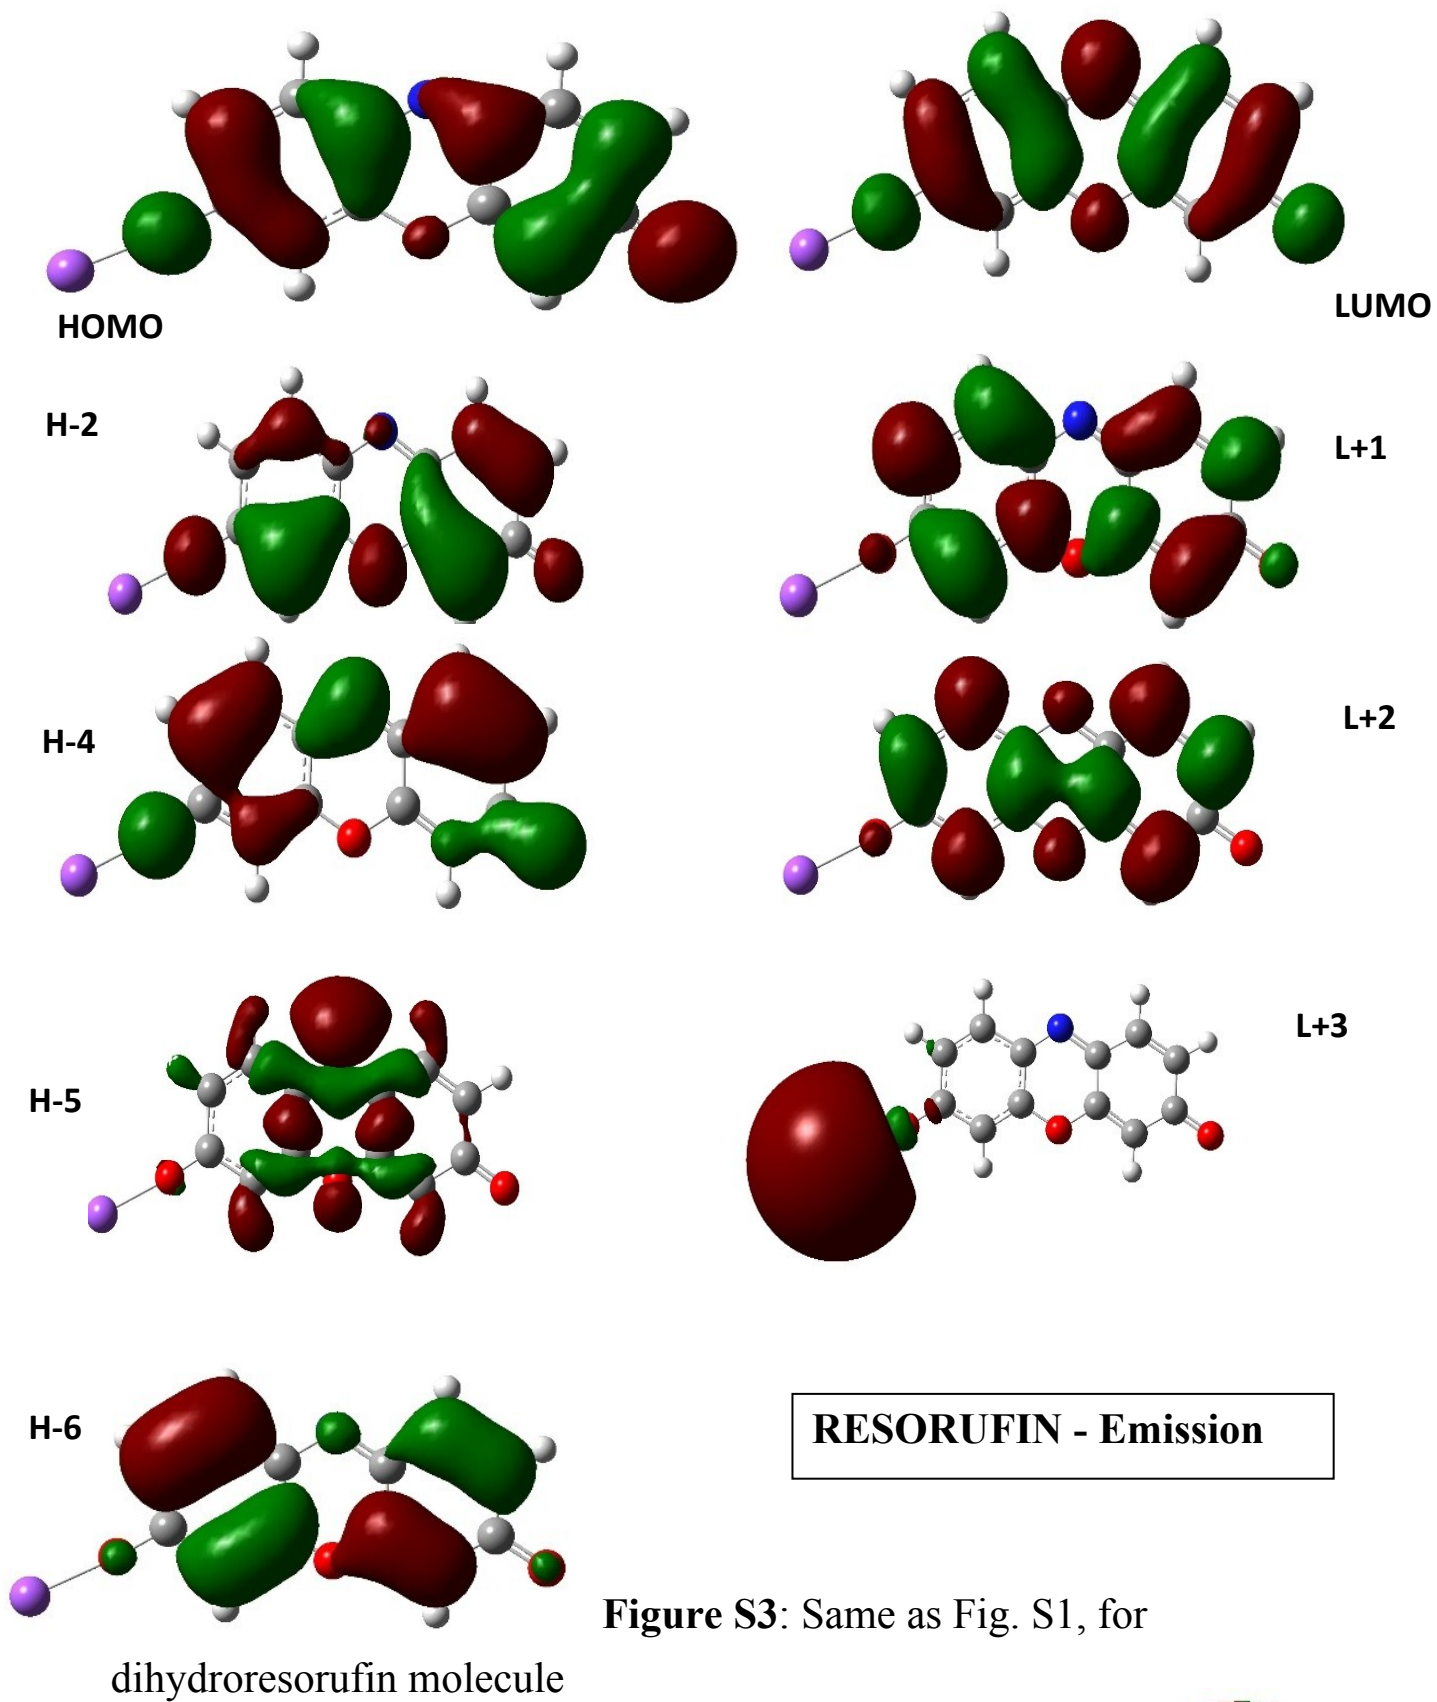

**Figure S3:** Same as Fig. S1, for

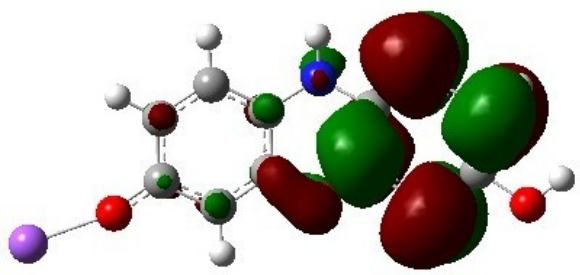

HOMO

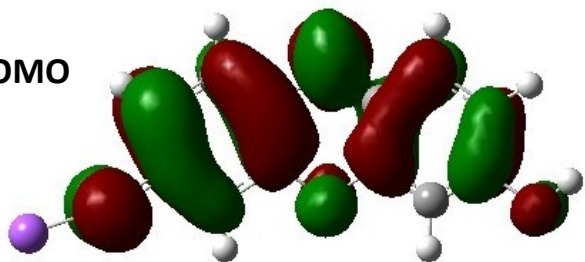

LUMO

H-1

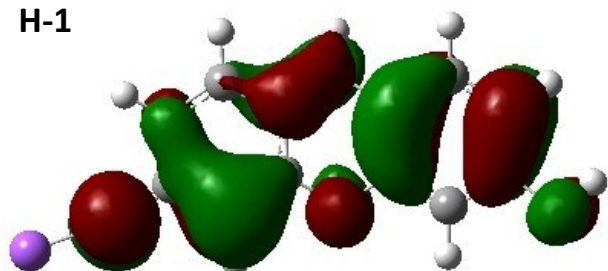

L+1

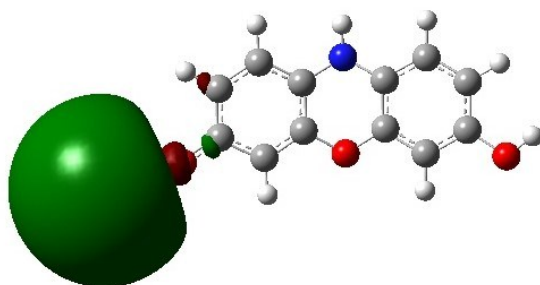

L+2

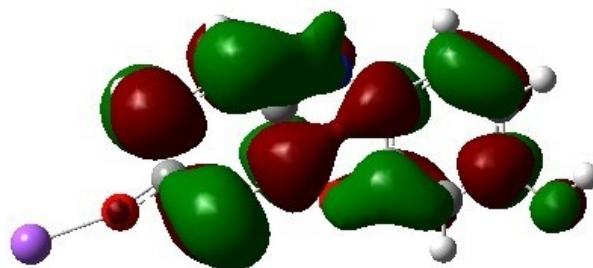

L+3

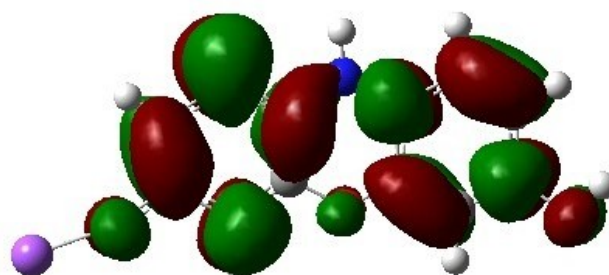

**Dihydroresorufin -Absorption**

HOMO

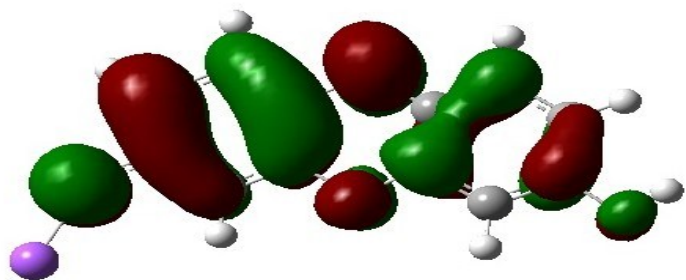

LUMO

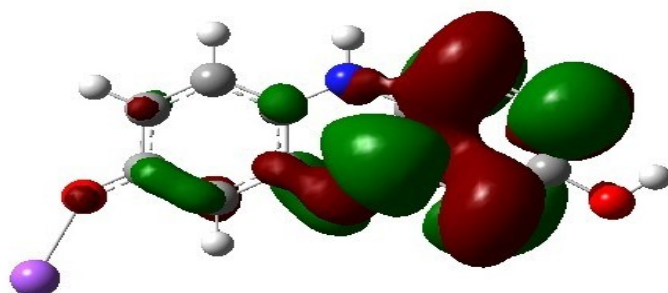

H-2

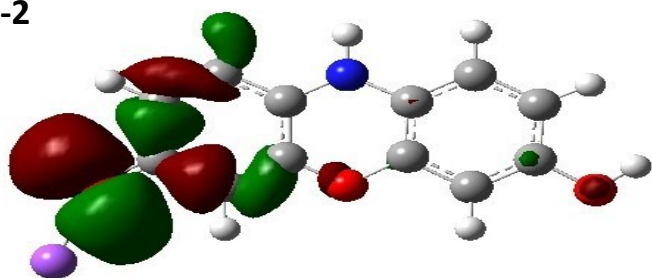

L+1

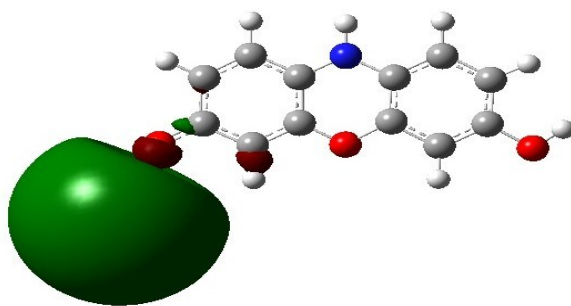

L+2

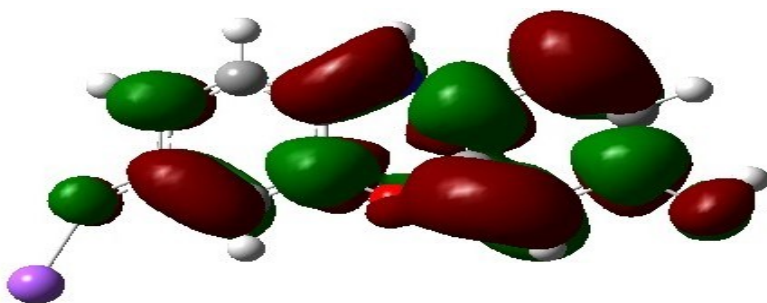

**Dihydroresorufin - Emission**
